# Supplementary material for: Effect of Non-Genetic Factors on Reproduction of Extensive versus Intensive Florida Dairy Goats
Source: MDPI journal article supplement (doi:10.3390/vetsci9050219), 2022-04-30
Supplement: s1 [file s1]

## Supplementary material

**Table S1.** Effect tests of the Generalized Linear Model (GLM) for age at first kidding in primiparous Florida goats.

| Source                                        | DF | L-R ChiSquare | Prob>ChiSq |
|-----------------------------------------------|----|---------------|------------|
| Production system                             | 1  | 89.857732     | < 0.0001   |
| Birth year                                    | 1  | 220.3907      | < 0.0001   |
| Birth season                                  | 3  | 239.20159     | < 0.0001   |
| Production system x Birth year                | 1  | 11.17099      | 0.0008     |
| Production system x Birth season              | 3  | 109.75964     | < 0.0001   |
| Birth season x Birth year                     | 3  | 37.665144     | < 0.0001   |
| Production system x Birth year x Birth season | 3  | 29.225186     | < 0.0001   |

Whole model: DF: 15; L-R ChiSquare: 1016.915; Prob > ChiSq:  $p < 0.001$ .

**Table S2.** Effect tests of the Generalized Linear Model (GLM) for kidding interval in multiparous Florida goats.

| Source                                                                      | DF | L-R ChiSquare | Prob>ChiSq |
|-----------------------------------------------------------------------------|----|---------------|------------|
| Production system                                                           | 1  | 0.398548      | 0.5278     |
| Lactation number                                                            | 4  | 54.376501     | < 0.0001*  |
| Type of kidding                                                             | 2  | 9.474654      | 0.0088*    |
| Kidding year                                                                | 1  | 1.4491605     | 0.2287     |
| Kidding season                                                              | 3  | 19.519195     | 0.0002*    |
| Dry period of the previous lactation                                        | 3  | 539.15701     | < 0.0001*  |
| Production system x Lactation number                                        | 4  | 3.4593634     | 0.4841     |
| Production system x Type of kidding                                         | 2  | 8.6050862     | 0.0135*    |
| Production system x Kidding year                                            | 1  | 1.6084657     | 0.2047     |
| Production system x Kidding season                                          | 3  | 2.480894      | 0.4788     |
| Production system x Dry period of the previous lactation                    | 3  | 0.3961241     | 0.9410     |
| Lactation number x Type of kidding                                          | 8  | 38.91693      | < 0.001*   |
| Lactation number x Kidding year                                             | 4  | 32.742038     | < 0.001*   |
| Lactation number x Kidding season                                           | 12 | 141.4737      | < 0.001*   |
| Lactation number x Dry period of the previous lactation                     | 12 | 93.148295     | < 0.001*   |
| Type of kidding x Kidding year                                              | 2  | 13.516223     | 0.0012*    |
| Type of kidding x Kidding season                                            | 6  | 12.94961      | 0.0438*    |
| Type of kidding x Dry period of the previous lactation                      | 6  | 2.9835178     | 0.8109     |
| Kidding year x Kidding season                                               | 3  | 21.546444     | < 0.0001*  |
| Kidding year x Dry period of the previous lactation                         | 3  | 4.5406746     | 0.2087     |
| Kidding season x Dry period of the previous lactation                       | 9  | 102.30823     | < 0.0001*  |
| Production system x Lactation number x Type of kidding                      | 8  | 19.195645     | 0.0138*    |
| Production system x Lactation number x Kidding year                         | 4  | 8.6644736     | 0.0701     |
| Production system x Lactation number x Kidding season                       | 12 | 76.481317     | < 0.0001*  |
| Production system x Lactation number x Dry period of the previous lactation | 12 | 18.69577      | 0.0961     |
| Production system x Type of kidding x Kidding year                          | 2  | 0.0609936     | 0.9700     |
| Production system x Type of kidding x Kidding season                        | 6  | 18.023035     | 0.0062*    |
| Production system x Type of kidding x Dry period of the previous lactation  | 6  | 7.6010206     | 0.2688     |
| Production system x Kidding year x Kidding season                           | 3  | 15.66609      | 0.0013*    |
| Production system x Kidding year x Dry period of the previous lactation     | 3  | 9.8160492     | 0.0202*    |
| Production system x Kidding season x Dry period of the previous lactation   | 9  | 69.457325     | < 0.0001*  |
| Lactation number x Type of kidding x Kidding year                           | 8  | 12.587115     | 0.1269     |
| Lactation number x Type of kidding x Kidding season                         | 24 | 34.689003     | 0.0731     |
| Lactation number x Type of kidding x Dry period of the previous lactation   | 24 | 62.85053      | < 0.0001*  |
| Lactation number x Kidding year x Kidding season                            | 12 | 43.62672      | < 0.0001*  |
| Lactation number x Kidding year x Dry period of the previous lactation      | 12 | 48.949589     | < 0.0001*  |
| Lactation number x Kidding season x Dry period of the previous lactation    | 36 | 194.61237     | < 0.0001*  |
| Type of kidding x Kidding year x Kidding season                             | 6  | 20.25101      | 0.0025*    |
| Type of kidding x Kidding year x Dry period of the previous lactation       | 6  | 34.282418     | < 0.0001*  |
| Type of kidding x Kidding season x Dry period of the previous lactation     | 18 | 80.094843     | < 0.0001*  |
| Kidding year x Kidding season x Dry period of the previous lactation        | 9  | 54.078894     | < 0.0001*  |

Whole model: DF: 312; L-R ChiSquare: 10137.58; Prob > ChiSq:  $p < 0.001$ . \*: significant results

**Table S3.** Effect tests of the Generalized Linear Model (GLM) for prolificacy in primiparous Florida goats.

| Source                                                    | DF | L-R ChiSquare | Prob>ChiSq |
|-----------------------------------------------------------|----|---------------|------------|
| Production system                                         | 1  | 17.976557     | < 0.0001*  |
| Kidding year                                              | 1  | 89.462834     | < 0.0001*  |
| Kidding season                                            | 3  | 5.8290473     | 0.1202     |
| Age at First Kidding                                      | 2  | 21.394988     | < 0.0001*  |
| Production system x Age at First Kidding                  | 2  | 0.3866391     | 0.8242     |
| Production system x Kidding year                          | 1  | 1.2618343     | 0.2613     |
| Production system x Kidding season                        | 3  | 31.549138     | < 0.0001*  |
| Age at First Kidding x Kidding year-cat                   | 2  | 7.4230595     | 0.0244*    |
| Age at First Kidding x Kidding season                     | 6  | 14.410496     | 0.0254*    |
| Kidding year x Kidding season                             | 3  | 8.4004231     | 0.0384*    |
| Production system x Age at First Kidding x Kidding year   | 2  | 1.6689346     | 0.4341     |
| Production system x Age at First Kidding x Kidding season | 6  | 13.747749     | 0.0326*    |
| Production system x Kidding year x Kidding season         | 3  | 9.1257106     | 0.0277*    |
| Age at First Kidding x Kidding year x Kidding season      | 6  | 64.347244     | < 0.0001*  |

Whole model: DF: 41; L-R ChiSquare: 1145.557; Prob > ChiSq:  $p < 0.001$ . \*: significant results

**Table S4.** Effect tests of the Generalized Linear Model (GLM) for prolificacy in multiparous Florida goats.

| Source                                                  | DF | L-R ChiSquare | Prob>ChiSq |
|---------------------------------------------------------|----|---------------|------------|
| Production system                                       | 1  | 7.4582508     | 0.0063*    |
| Kidding year                                            | 1  | 67.262519     | < 0.0001*  |
| Kidding season                                          | 3  | 23.604416     | < 0.0001*  |
| Lactation number                                        | 4  | 58.362998     | < 0.0001*  |
| Kidding interval                                        | 2  | 21.55524      | < 0.0001*  |
| Production system x Lactation number                    | 4  | 24.930867     | < 0.0001*  |
| Production system x Kidding interval                    | 2  | 1.4413976     | 0.4864     |
| Production system x Kidding year                        | 1  | 67.90127      | < 0.0001*  |
| Production system x Kidding season                      | 3  | 6.3905675     | 0.0941     |
| Lactation number x Kidding interval                     | 8  | 10.128141     | 0.2561     |
| Lactation number x Kidding year                         | 4  | 16.324891     | 0.0026*    |
| Lactation number x Kidding season                       | 12 | 24.111894     | 0.0196*    |
| Kidding interval x Kidding year                         | 2  | 3.7731312     | 0.1516     |
| Kidding interval x Kidding season                       | 6  | 11.890335     | 0.0645     |
| Kidding year x Kidding season                           | 3  | 20.657707     | 0.0001*    |
| Production system x Lactation number x Kidding interval | 8  | 22.675499     | 0.0038*    |
| Production system x Lactation number x Kidding year     | 4  | 21.92997      | 0.0002*    |
| Production system x Lactation number x Kidding season   | 12 | 40.372304     | < 0.0001*  |
| Production system x Kidding interval x Kidding year     | 2  | 0.6986553     | 0.7052     |
| Production system x Kidding interval x Kidding season   | 6  | 17.687084     | 0.0071*    |
| Production system x Kidding year x Kidding season       | 3  | 9.0533756     | 0.0286*    |
| Lactation number x Kidding interval x Kidding year      | 8  | 20.102375     | 0.0100*    |
| Lactation number x Kidding interval x Kidding season    | 24 | 58.834424     | < 0.0001*  |
| Lactation number x Kidding year x Kidding season        | 12 | 23.492013     | 0.0238*    |
| Kidding interval x Kidding year x Kidding season        | 6  | 37.258553     | < 0.0001*  |

Whole model: DF: 141; L-R ChiSquare: 1156.009; Prob > ChiSq:  $p < 0.001$ . \*: significant results
